# Supplementary material for: Exploring Plastomic Resources in Sempervivum (Crassulaceae): Implications for Phylogenetics
Source: MDPI journal article supplement (doi:10.3390/genes15040441), 2024-03-30

***S. arachnoideum***

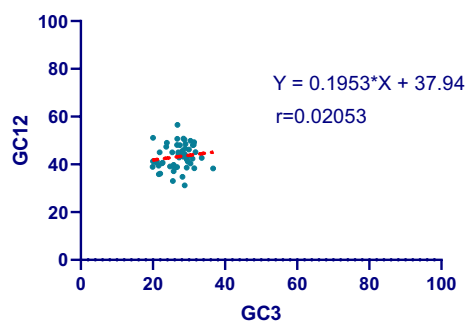

***S. calcareum***

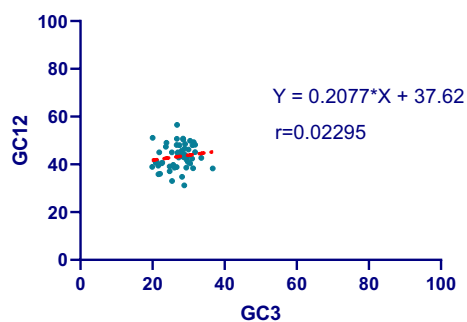

***S. globiferum***

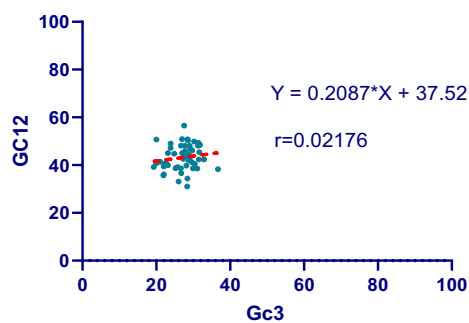

***S. globiferum* subsp. *hirtum***

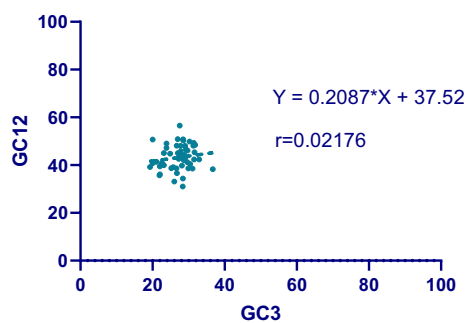

***S. funckii***

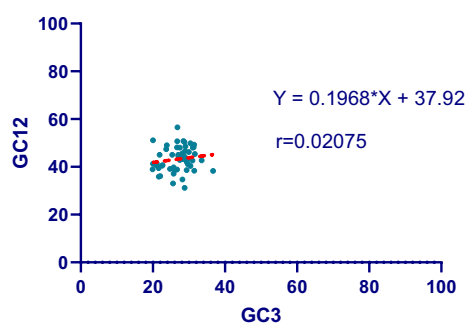

***S. ciliosum***

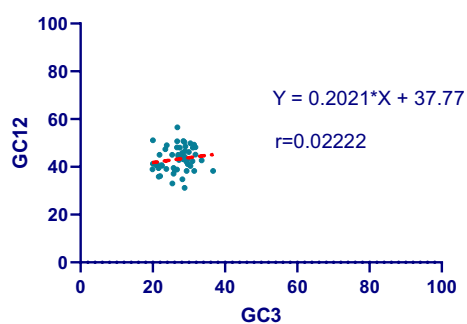

***S. heuffelii***

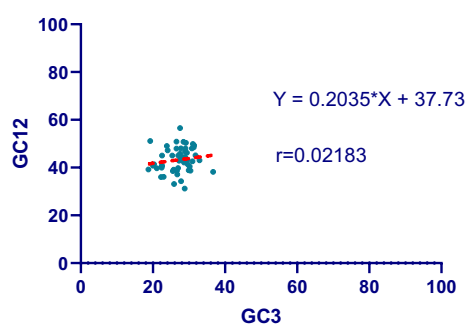

***S. tectorum***

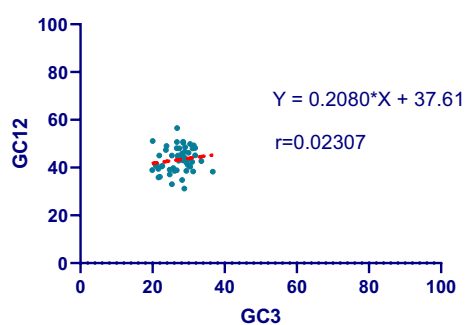

Supplement: s1 [file s1]
